# Supplementary material for: Olefin copolymerization via reversible addition–fragmentation chain transfer
Source: Royal Society of Chemistry journal article supplement (doi:10.1039/b403342f), 2004-01-01
Supplement: b403342f.doc [file b403342f.doc]

Supplementary Information

**Olefin Copolymerization via Reversible Addition –Fragmentation Chain Transfer**

Rajan Venkatesh, Bastiaan B. P. Staal, Bert Klumperman*

Dutch Polymer Institute, Eindhoven University of Technology, Department of Polymer Chemistry,
Den Dolech 2, P O Box 513, 5600 MB Eindhoven, The Netherlands

**Contents:**

Experimental

Materials

Analysis and Measurements

Choice of RAFT agent

Polymerization

References

**Figures:**

Figure 1. Plot of Conversion *vs* time for BA/Octene RAFT copolymerization.

Figure 2. Plot of Conversion *vs* time for MMA/Octene RAFT copolymerization.

Figure 3. Plot of Mn *vs* overall conversion for BA/Octene RAFT copolymerization.

Figure 4. Development of MMD in a BA/Octene RAFT copolymerization.

Figure 5. Plot of Mn *vs* overall conversion for MMA/Octene RAFT copolymerization.

Figure 6. MALDI-TOF-MS spectrum for P[(BA)-co-(Octene)] copolymer.

Figure 7. Detail of MALDI-TOF-MS spectrum for P[(BA)-co-(Octene)] copolymer, comparison of the observed and theoretical isotopic distributions.

Figure 8. 13C NMR for P[(BA)-co-(Octene)] copolymer.

### Experimental

**Materials** Methyl methacrylate (MMA, Merck, 99+%), Butyl acrylate (BA, Merck, 99+%) and 1-octene (Aldrich, 98%) were distilled and stored over molecular sieves at
–15ºC. *p*-Xylene (Aldrich, 99+% HPLC grade) was stored over molecular sieves and used without further purification. The RAFT agents, S,S’-Bis(,’-dimethyl-’’-acetic acid)trithiocarbonate1 and 2-cyanopropyl-2-yl dithiobenzoate2 were synthesized as described in literature. Tetrahydrofuran (THF, Aldrich, AR), was used as supplied.
,’-Azobisisobutyronitrile (AIBN, Merck, >98%) was recrystallized twice from methanol before use. 2,2’-Azobis(2,4- dimethylvaleronitrile) (V-65, Wako, >99%) was used as received.

**Analysis and Measurements**

*Determination of Conversion and MMD* Monomer conversion was determined from the concentration of the residual monomer measured via gas chromatography (GC). A Hewlett-Packard (HP-5890) GC, equipped with a HP Ultra 2 cross-linked 5% Me-Ph-Si column (25 m  0.32 mm  0.52 m) was used. *p*-Xylene was employed as the internal reference. The GC temperature gradient used is given.

GC temperature gradient.

Molar mass (MM) and molar mass distributions (MMD) were measured by size exclusion chromatography (SEC), at ambient temperature using a Waters GPC equipped with a Waters model 510 pump and a model 410 differential refractometer (40 ºC). THF was used as the eluent at a flow rate of 1.0 mL/min. A set of two linear columns (Mixed-C, Polymer Laboratories, 30 cm, 40 ºC) was used. Calibration was carried out using narrow MMD polystyrene (PS) standards ranging from 600 to 7  106 g/mol. The molecular weights were calculated using the universal calibration principle and Mark-Houwink parameters3 [PMMA: K = 9.55  10-5 dL/g, a = 0.719; PBA: K = 1.22  10-4 dL/g, a = 0.700; PS: K = 1.14  10-4 dL/g, a = 0.716]. Molecular weights were calculated relative to the relevant homopolymer (in this case PBA or PMMA). Data acquisition and processing were performed using Waters Millenium 32 software.

*GPEC Analysis* GPEC measurements were carried out on an Alliance Waters 2690 seperation module with a Waters 2487 dual  absorbance detector and a PL-EMD 960 ELSD detector (nitrogen flow 5.0 L/min, temperature 70 ºC). A Nova-Pak Cyano-Propyl (CN HP) 4 m column (3.9 mm  150 mm, 60 Å, Waters) was used at 40 ºC. The gradient employed is detailed in Table 1. The column was reset at the end of the gradient to initial conditions between 25 and 30 mins. HPLC grade solvents were obtained from BioSolve. A Varian 9010 solvent delivery system was used to maintain a stable flow rate of the eluents. Dilute polymer solutions were made in THF (10 mg/mL) and a sample of 10 L was used for analysis. Chromatograms were analyzed using the Millennium 32 software version 3.05.

Table 1. Linear Binary gradient used for GPEC

| Step | Time (min) |  water |  acetonitrile |  THF | Flow (ml/min) |
| --- | --- | --- | --- | --- | --- |
| 1 | Initial | 0.4 | 0.6 | 0 | 0.5 |
| 2 | 20 | 0 | 1 | 0 | 0.5 |
| 3 | 25 | 0 | 0 | 1 | 0.5 |
| 4 | 30 | 0.4 | 0.6 | 0 | 0.5 |

The eluent compositions are given in volume fraction ().

*MALDI-TOF-MS* Measurements were performed on a Voyager-DE STR (Applied Biosystems, Framingham, MA) instrument equipped with a 337 nm nitrogen laser. Positive-ion spectra were acquired in reflector mode. DCTB (trans-2-[3-(4-tert-butylphenyl)-2-methyl-2-propenylidene]malononitrile) was chosen as the matrix. Sodium trifluoracetate (Aldrich, 98%) was added as the cationic ionization agent. The matrix was dissolved in THF at a concentration of 40 mg/mL. Sodium trifluoracetate was added to THF at a concentration of 1 mg/mL. The dissolved polymer concentration in THF was approximately 1 mg/mL. In a typical MALDI experiment, the matrix, salt and polymer solutions were premixed in the ratio: 5 L sample: 5 L matrix: 0.5 L Salt. Approximately 0.5 L of the obtained mixture was hand spotted on the target plate. For each spectrum 1000 laser shots were accumulated.

**Choice of RAFT agent**

S,S’-Bis(,’-dimethyl-’’-acetic acid)trithiocarbonate was chosen for its high chain transfer efficiency in radical polymerization,1 and it is known from literature that well controlled PBA can be synthesized using the isobutyric acid group as the initiating species.1

2-cyanopropyl-2-yl dithiobenzoate was employed because it is known from literature to yield well controlled PMMA, as of result of its high chain transfer coefficient coupled with the fact that the cyanoisopropyl group is a good initiating species for MMA polymerization.4,5

**Polymerization**

A typical copolymerisation of BA and 1-octene was carried out as follows: The RAFT (0.1130 g; 4.0  10-4 mol) and AIBN (0.003 g; 1.8  10-5 mol) were accurately weighed and then transferred to a 25 ml three-neck round-bottom flask. Then a solution of
*p*-xylene (3.83 g; 3.6  10-2 mol), butyl acrylate (0.94 g; 7.36  10-3 mol) and 1-octene (0.82 g; 7.36  10-3 mol) was added. Methyl ethyl ketone (3.22 g; 4.4  10-2 mol) was added to totally solubilize the RAFT and make the system homogeneous. After the reaction mixture was bubbled with argon for 30 min, the flask was immersed in a thermostated oil bath kept at 80 °C. The reaction was carried out under a flowing argon atmosphere. The initiator AIBN (0.003 g; 1.8  10-5 mol) was added at three pre-determined time intervals during the copolymerisation. Samples were withdrawn at suitable time periods throughout the polymerization. The sample was immediately diluted with THF. Some of this diluted sample was transferred immediately into a GC vial and further diluted with THF, so as to determine the monomer conversion using GC. The remaining sample was used for SEC and MALDI-TOF-MS measurements.

## References

1) J. T. Lai, D. Filla, R. Shea, *Macromolecules*, 2002, **35**, 6754.

2) J. Chiefari, Y. K Chong, F. Ercole, J. Krstina, J. Jeffery, T. P. T. Le, R. T. A Mayadunne, G. F. Meijs, C. L. Moad, G. Moad, E. Rizzardo, S. H. Thang, *Macromolecules*, 1998, **31**, 5559.

3) S. Beuermann, D. A. Paquet, Jr., J. H. McMinn, R. A. Hutchinson, *Macromolecules*, 1996, **29**, 4206.

4) Y. K. Chong, J. Krstina, T. P. T. Le, G. Moad, A. Postma, E. Rizzardo, S. H. Thang, *Macromolecules*, 2003, **36**, 2256.

5) G. Moad, J. Chiefari, Y. K. Chong, J. Krstina, R. T. A Mayadunne, A. Postma, E. Rizzardo, S. H. Thang, *Polym. Int*., 2000, **49**, 993.

**Figure 1.** Plot of overall conversion *vs* time for the RAFT mediated copolymerization of BA and 1-Octene. For 75/25, fOctene = 0.25 and for 50/50, fOctene = 0.50. Reaction temperature = 80 °C. [Monomer]**:**[S,S’-Bis(,’-dimethyl-’’-acetic acid)trithiocarbonate]**:**[AIBN] = 36.8**:**1**:**0.18. (For further information please refer to Table 1 in manuscript, entries 1 and 2 respectively).

**Figure 2.** Plot of overall conversion *vs* time for the RAFT mediated copolymerization of MMA and 1-Octene. For 75/25, fOctene = 0.25 and for 50/50, fOctene = 0.50. Reaction temperature = 50 °C. [Monomer]**:**[2-cyanopropyl-2-yl dithiobenzoate]**:**
[V-65 (2,2’-azobis(2,4- dimethylvaleronitrile))] = 47.6**:**1**:**0.125. (For further information please refer to Table 2 in manuscript, entries 1 and 2 respectively).

**Figure 3.** Plot of molar mass (Mn) *vs* overall conversion for the RAFT mediated copolymerization of BA and 1-Octene (fOctene = 0.25). Reaction temperature = 80 °C. [Monomer] **:** [S,S’-Bis(,’-dimethyl-’’-acetic acid)trithiocarbonate] **:** [AIBN] = 36.8**:**1**:**0.05.

**Figure 4.** Development of MMD in the RAFT mediated copolymerization of BA and 1-Octene (foct = 0.25). Reaction temperature = 80 °C. [Monomer]**:**[S,S’-Bis(,’-dimethyl-’’-acetic acid)trithiocarbonate]**:**[AIBN] = 36.8**:**1**:**0.05.

**Figure 5.** Plot of molar mass (Mn) *vs* overall conversion for the RAFT mediated copolymerization of MMA and 1-Octene (fOctene = 0.25). Reaction temperature = 50 °C. [Monomer]**:**[2-cyanopropyl-2-yl dithiobenzoate]**:**[V-65] = 47.6**:**1**:**0.125.

**Figure 6.** MALDI-TOF-MS spectrum for the BA/Octene copolymer synthesized using RAFT. fOctene = 0.50, FOctene = 0.22 [Reflector mode; Matrix - DCTB (trans-2-[3-(4-tert-butylphenyl)-2-methyl-2-propenylidene]malononitrile)]

**Figure 7.** Detail of the MALDI-TOF-MS spectrum for the BA/Octene copolymer synthesized using RAFT. fOctene = 0.50, FOctene = 0.22. Isotopic mass distributions : observed (above) and theoretical (below), for a polymer chain having end group **E1** and having 13 monomeric units of butyl acrylate (B) and 2 monomeric units of octene(O).

**Figure 8.** 13C NMR spectrum of P[(BA)-co-(Octene)] synthesized using RAFT in CDCl3 recorded under fast pulse conditions. fOctene = 0.50, FOctene = 0.22.
Mn = 2.4  103 g/mol, PDI = 1.3.
